# Supplementary material
Source: publisher figshare collection journal article supplement (https://acs.figshare.com/ndownloader/files/4010362)
Supplement: Supplementary file 1 [file 4010362]

## Supporting Information

---

### Nanostructured TiO<sub>2</sub> Anatase Micro Patterned 3D Electrodes for High Performance Li-ion Batteries

Deepak P. Singh<sup>1</sup>, A. George<sup>2</sup>, R.V. Kumar<sup>3</sup>, J.E. ten Elshof<sup>2</sup> and Marnix Wagemaker<sup>1\*</sup>

<sup>1</sup>Department of Radiation Science and Technology, Delft University of Technology, Mekelweg 15, Delft 2629JB, The Netherlands

<sup>2</sup>MESA+ Institute of Nanotechnology, University of Twente, Enschede, The Netherlands

<sup>3</sup>Department of Material Science and Metallurgy, University of Cambridge, Cambridge, United Kingdom

E-mail – M.Wagemaker@tudelft.nl

---

#### 1. TiO<sub>2</sub> Sample calcined at 400 °C

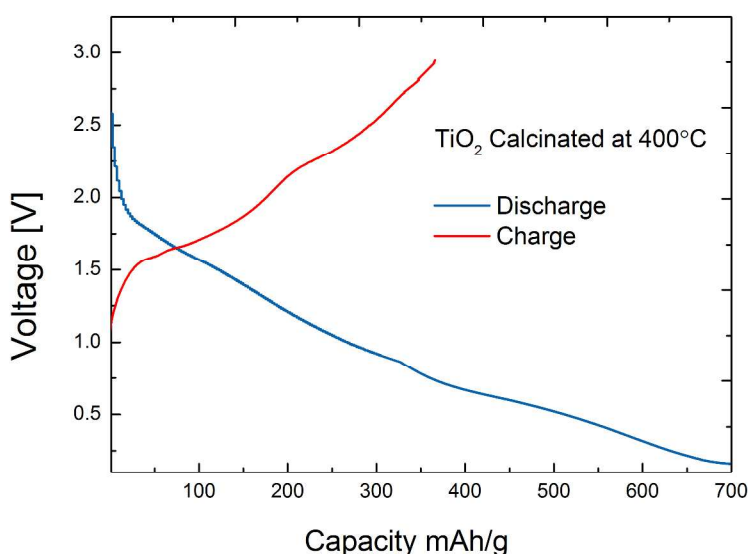

**Figure S1:** *Electrochemical charging profiles at constant charge-discharge rate (C/10) with 0V cut-off.*

## 2. $\text{TiO}_2$ Sample calcined at $550\text{ }^\circ\text{C}$ :

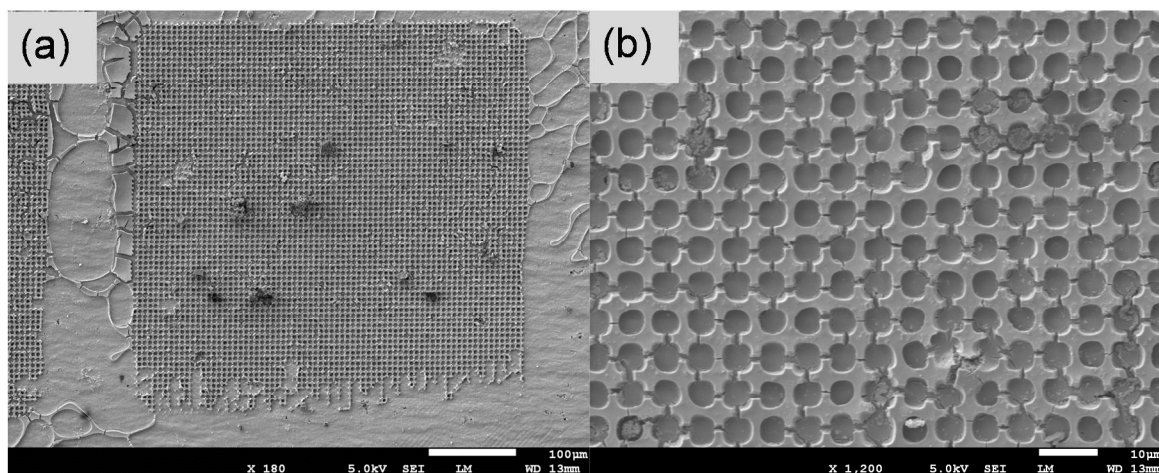

**Figure S2:** (a)-(b) SEM images of 3D micro patterns of  $\text{TiO}_2$  anatase electrodes at various magnifications prepared at  $550\text{ }^\circ\text{C}$ .

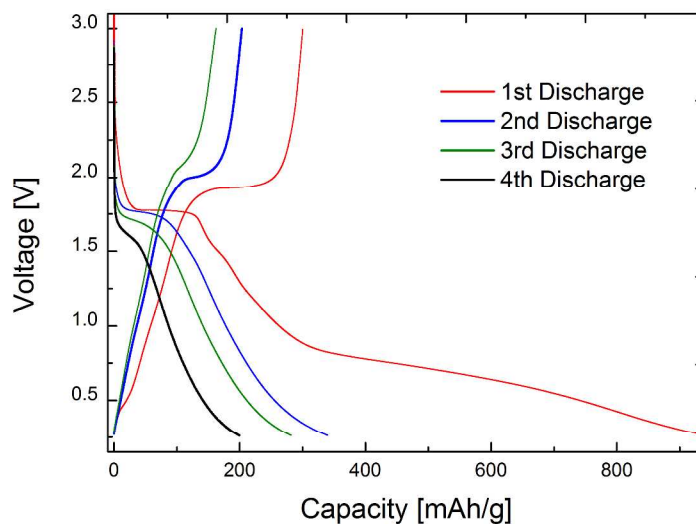

**Figure S3:** Electrochemical charging profiles constant charge-discharge rate ( $C/10$ ).

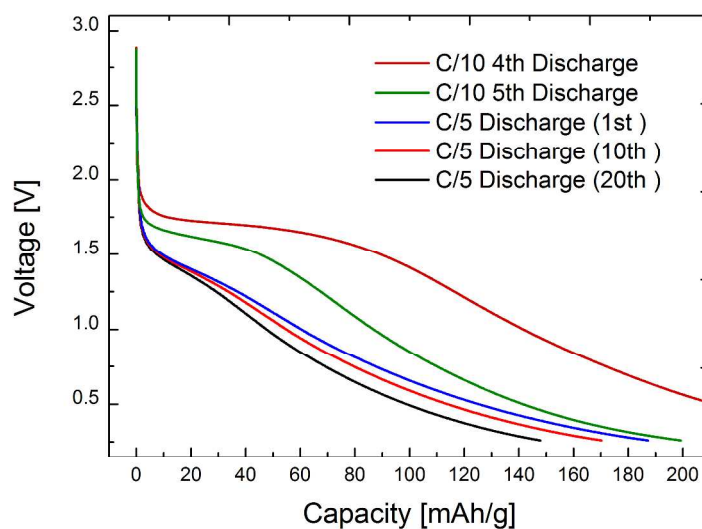

**Figure S4:** *Electrochemical discharge at C/10 and C/5 rate and 0V cut-off.*

### 3. $\text{TiO}_2$ Sample calcined at 650 °C :

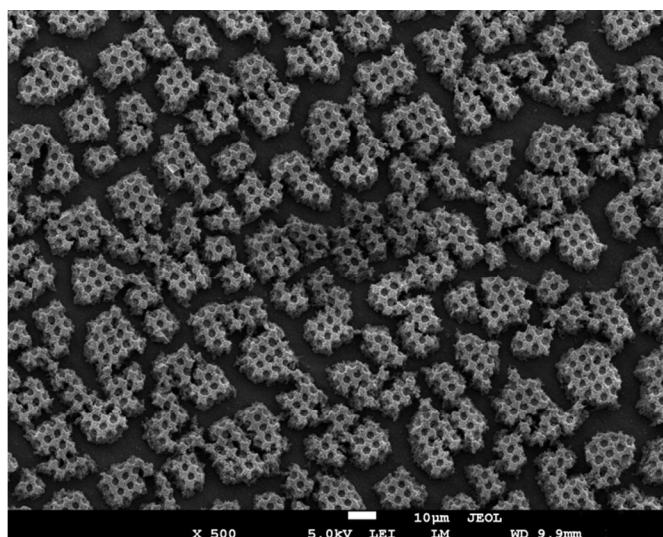

**Figure S5:** *SEM images of 3D micro patterns of  $\text{TiO}_2$  anatase electrode prepared at 650 °C.*

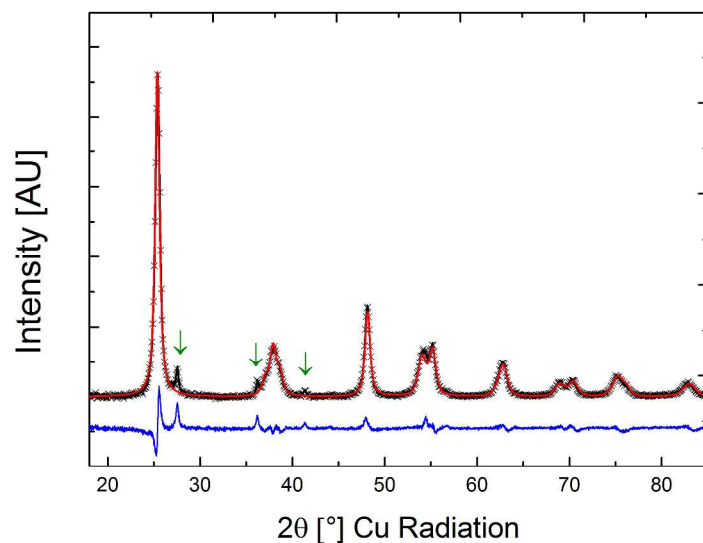

**Figure S6:** *Rietveld Refinement of X-ray diffraction pattern for anatase  $\text{TiO}_2$  calcined at 650 °C for 2 h. Addition peaks for rutile phase are marked with green arrow.*

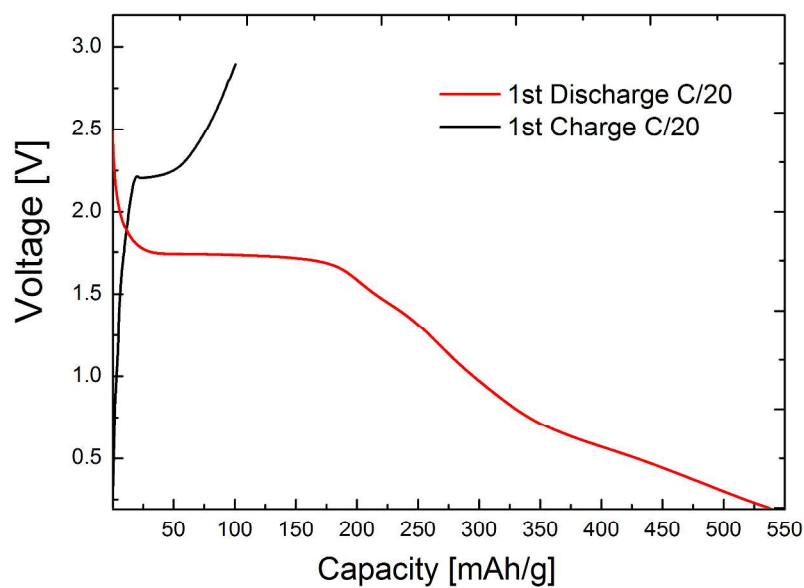

**Figure S7 :** *Electrochemical (dis)charge profiles at constant charge-discharge rate (C/20). (Sample calcinated at 650 °C for 2 hrs. )*

#### 4. Cross Sectional SEM of TiO<sub>2</sub> Micro pattern after Cycling at variable C Rate (C/10 to 60C)

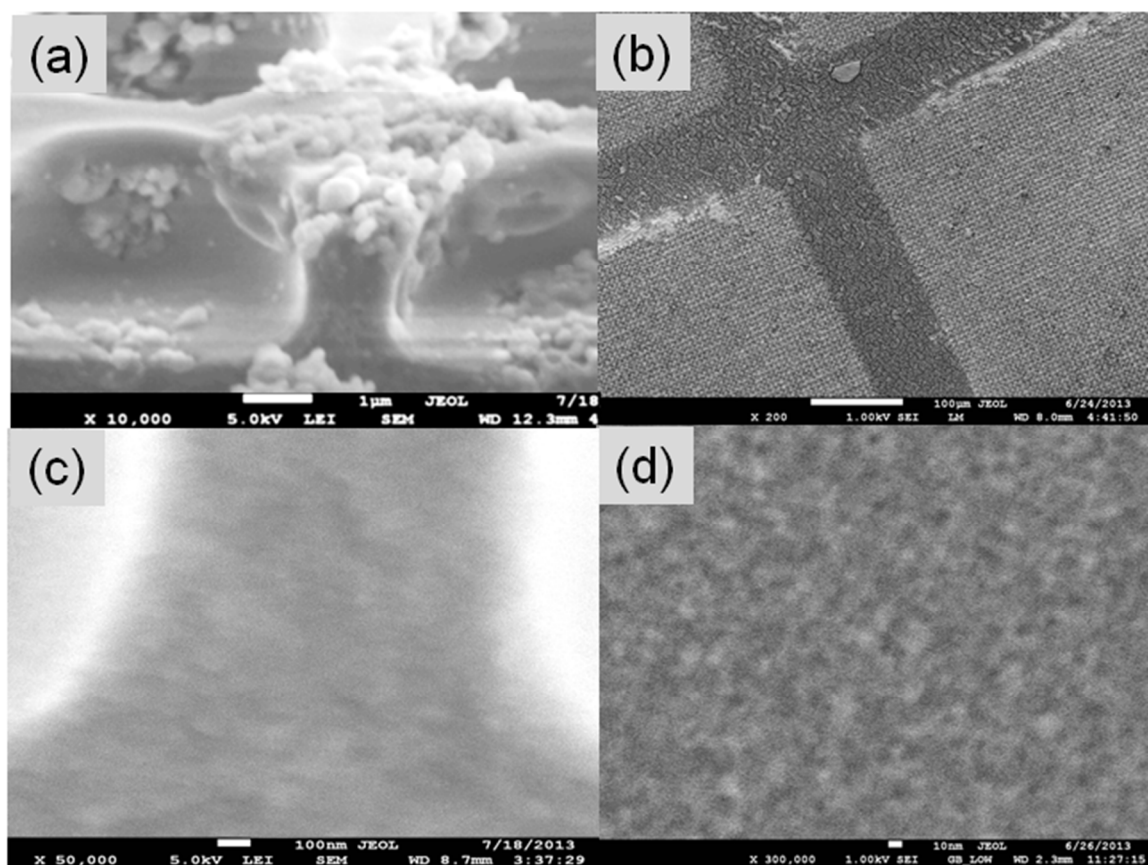

**Figure S8:** Cross sectional SEM of TiO<sub>2</sub> Micro pattern after cycling at variable C rate (C/10 to 60C)

## 5. XRD – $\text{TiO}_2$ and $\text{Li}_x\text{TiO}_2$ Calcinated to $400^\circ\text{C}$

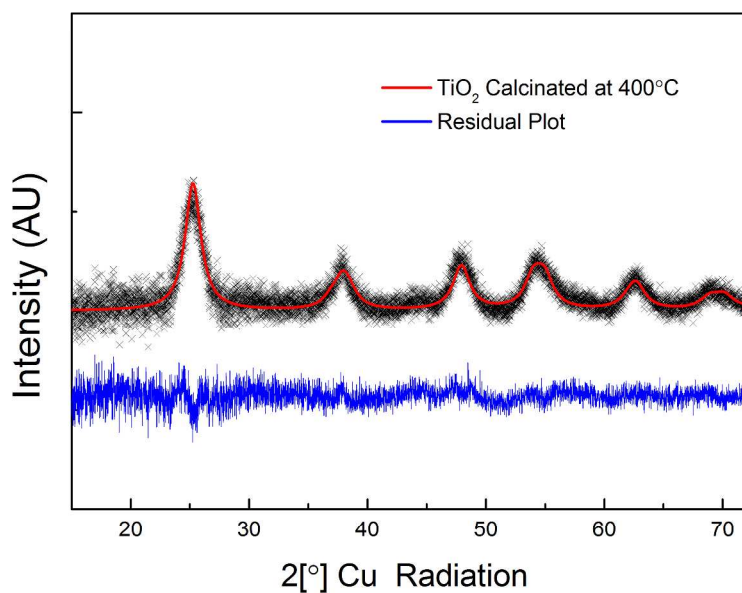

**Figure S9:** Rietveld refinement of X-ray diffraction pattern for nano sized anatase  $\text{TiO}_2$  calcined at  $400^\circ\text{C}$  for 2 h.

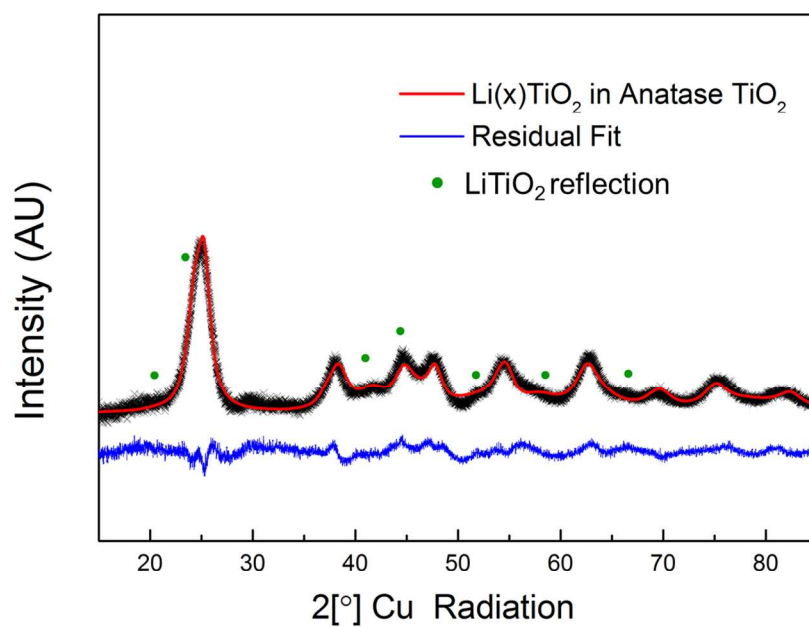

**Figure S10:** *Rietveld Refinement of X-ray diffraction pattern for lithiated  $\text{TiO}_2$  for  $\text{TiO}_2$  calcined at 400 °C for 2 h. The data is fitted with the orthorhombic  $\text{Li}_{0.5}\text{TiO}_2$  phase (space group  $\text{Imma}$ ,  $a=3.8186$ ,  $b=4.0842$ ,  $c=9.0656$  Å) and the green dots indicate the position where the tetragonal  $\text{LiTiO}_2$  phase would be expected. A small fraction of the material appears to have the  $\text{LiTiO}_2$  phase.*
